# Supplementary material
Source: ML conference proceedings conference paper supplement (https://www.ecva.net/papers/eccv_2020/papers_ECCV/html/123660052_ECCV_2020_paper.php)
Supplement: Supplementary file 2 [file 123660052-supp.zip]

Archive with 5 entries (5 files):
- video1.mp4
- video4.mp4
- video5.mp4
- ../main_supplementary.pdf
- main_supplementary.pdf
